# Supplementary material for: Methionine Restriction Activates the Retrograde Response and Confers Both Stress Tolerance and Lifespan Extension to Yeast, Mouse and Human Cells
Source: PLoS One. 2014 May 15;9(5):e97729. doi: 10.1371/journal.pone.0097729 (PMC4022668; doi:10.1371/journal.pone.0097729)
Supplement: Table S3 — List of primers used for qRT-PCR analyses. (XLS) [file pone.0097729.s005.xls]

## Sheet: Sheet1
Table S3. List of primers used for qRT-PCR analyses.
Amplicon	Upstream Primer Sequence	Downstream Primer Sequence
tRNA-E-MET	GCTTCAGTAGCTCAGTAGGAAG	AGGGGAGGTTCGAACTCT
tRNA-CYS	CTCGTATGGCGCAGTGGTAG	TCGCACTCAGGATCGAAC
tRNA-SER	GGCAACTTGGCCGAGTGGTTAAG	AACTGCAGGACTCGAACC
ACT1	AGAACCACCAATCCAGACGGAGT	ATGCAAAAGGAAATCACCGCTTT
Mouse Mtr	GAGTAAGACCTATGAGGATGATGGCG	TCTCGGCGAACTCTCTCATGGAG
Human MTR	AATGGCACCTGCTTCAGCAGTC	CCTCAGCCACAGATATGTTCTTCCTC
Human RELA	CGAATGGCTCGTCTGTAGTG	CTCCACATAGGGGCCAGAG
Human RELB	TGACCCCCATGGCATCGAG	CGGGAGGAACGGGCCTGA
Human NFKBIA	TGACACAGAGTCAGAGTTCACGGAGT	CCCCTTTGCGCTCATAACGTC
Actb/ACTB	AGCGGGAAATCGTGCGTGACATTA	GGAGGAGCAATGATCTTGATCTTC
